# Supplementary material
Source: PubMed Central journal article supplement (PMC6470008)
Supplement: NIHMS1007183-supplement-SI.pdf [file NIHMS1007183-supplement-SI.pdf]

## Supporting Information

### Assembly of metallacages into Soft Suprastructures with Dimensions of up to Microns and the Formation of Composite Materials

Yan Sun,<sup>a,b\*</sup> Fengmin Zhang,<sup>c</sup> Shaowei Jiang,<sup>d</sup> Zhifeng Wang,<sup>c</sup> Ruidong Ni,<sup>e</sup> Heng Wang,<sup>e</sup> Weidong Zhou,<sup>c</sup> Xiaopeng Li,<sup>e</sup> and Peter J. Stang<sup>b\*</sup>

- a. School of Chemistry and Chemical Engineering, Yangzhou University, Yangzhou, Jiangsu, 225002, P. R. China
- b. Department of Chemistry, University of Utah, 315 South 1400 East, Room 2020, Salt Lake City, Utah 84112, United States
- c. Testing Center of Yangzhou University, Yangzhou, Jiangsu, 225002, P. R. China
- d. School of Medicine, Shanghai Jiao Tong University, Shanghai, China, 200240, P. R. China
- e. Department of Chemistry, University of South Florida, 4202 East Fowler Avenue, Tampa, Florida 33620, United States

To whom correspondence should be addressed.  
Email address: sunyan@yzu.edu.cn; stang@chem.utah.edu

Additional NMR, UV-vis, and fluorescence spectra data, scanning electron microscope, transmission electron microscopy, and fluorescence microscope images were provided in the Supporting Information.

## Supporting Information

|                                                                                                                         |     |
|-------------------------------------------------------------------------------------------------------------------------|-----|
| <b>1.1</b> $^{31}\text{P}\{^1\text{H}\}$ NMR spectrum of cage <b>1</b>                                                  | S4  |
| <b>1.2</b> $^1\text{H}$ NMR spectrum of cage <b>1</b>                                                                   | S4  |
| <b>1.3</b> ESI -TOF-MS spectrum of cage <b>1</b>                                                                        | S5  |
| <b>1.4</b> UV-vis spectrum of cage <b>1</b> (10 $\mu\text{M}$ ) in DCM                                                  | S5  |
| <b>1.5</b> UV-vis spectrum of cage <b>1</b> (10 $\mu\text{M}$ ) in EA                                                   | S6  |
| <b>1.6</b> UV-vis spectrum of Cage <b>1</b> (10 $\mu\text{M}$ ) in DCM/EA mixture with 80% EA                           | S6  |
| <b>1.7</b> Fluorescence spectrum of cage <b>1</b> (10 $\mu\text{M}$ ) in DCM.                                           | S7  |
| <b>1.8</b> Fluorescence spectrum of cage <b>1</b> (10 $\mu\text{M}$ ) in EA.                                            | S7  |
| <b>1.9</b> Fluorescence spectrum of Cage <b>1</b> (10 $\mu\text{M}$ ) in DCM/EA mixture with 80% EA                     | S8  |
| <b>1.10</b> Corresponding histograms of microflowers formed in 80 % EA                                                  | S8  |
| <b>1.11</b> $^{31}\text{P}\{^1\text{H}\}$ NMR spectrum of cage <b>1</b> -based microflowers                             | S9  |
| <b>1.12</b> Fluorescence microscopy images of microflowers formed in 80 % EA                                            | S9  |
| <b>1.13</b> $^1\text{H}$ NMR spectrum of cage <b>1</b> -based microflowers                                              | S10 |
| <b>1.14</b> ESI -TOF-MS spectrum of cage <b>1</b> formed in 80 % EA                                                     | S10 |
| <b>1.15</b> Simulated structure of the cage <b>1</b>                                                                    | S11 |
| <b>1.16</b> SEM images of (a) nanostructures formed in 90% EA                                                           | S11 |
| <b>1.17</b> XRD profile                                                                                                 | S12 |
| <b>1.18</b> Fluorescence spectra of cage <b>1</b>                                                                       | S13 |
| <b>1.19</b> UV-vis spectra of cage <b>1</b>                                                                             | S13 |
| <b>1.20</b> NMR spectra of cage <b>1</b> in DCM/EA mixtures                                                             | S14 |
| <b>1.21</b> Assemblies obtained at different times                                                                      | S15 |
| <b>1.22</b> Elemental mapping analysis of microneedles/microflowers                                                     | S15 |
| <b>1.23</b> Microneedles/microflowers obtained at different temperature                                                 | S15 |
| <b>1.24</b> Chemical structure of lysine-modified perylene                                                              | S16 |
| <b>1.25</b> Histograms of the size distribution of microflowers formed in 80% EA                                        | S16 |
| <b>1.26</b> Optical and polarized images of needle-based flowers formed by the coassembly of cage <b>1</b> and perylene | S16 |
| <b>1.27</b> SAXS profile of needle-based flowers formed by the coassembly of cage <b>1</b> and perylene                 | S17 |

|                                                                                                                                         |     |
|-----------------------------------------------------------------------------------------------------------------------------------------|-----|
| <b>1.28</b> $^{31}\text{P}\{^1\text{H}\}$ NMR spectra microflowers redispersed in DCM                                                   | S17 |
| <b>1.29</b> $^1\text{H}$ -NMR of cage <b>1</b> , perylene, and the mixture of cage <b>1</b> and perylene                                | S18 |
| <b>1.30</b> Fluorescence microscopy images of the chlorophyll-a containing assemblies                                                   | S18 |
| <b>1.31</b> $^1\text{H}$ -NMR of cage <b>1</b> , chlorophyll-a, and the mixture of cage <b>1</b> and chlorophyll-a                      | S19 |
| <b>1.32</b> Fluorescence microscopy images of the chlorophyll-a containing assemblies                                                   | S19 |
| <b>1.33</b> $^1\text{H}$ -NMR of cage <b>1</b> , Vitamin B <sub>12</sub> , and the mixture of cage <b>1</b> and Vitamin B <sub>12</sub> | S20 |

1.1  $^{31}\text{P}\{^1\text{H}\}$  NMR spectrum (300 MHz,  $\text{CD}_2\text{Cl}_2$ ) recorded for cage **1**.

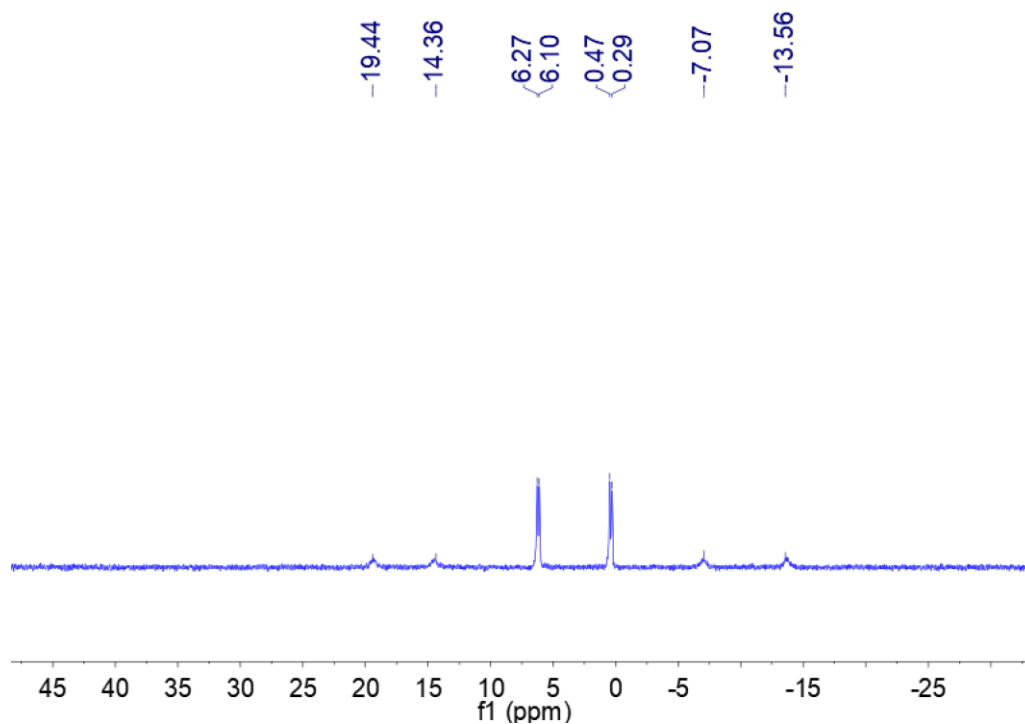

Figure S1.  $^{31}\text{P}\{^1\text{H}\}$  NMR spectrum ( $\text{CD}_2\text{Cl}_2$ ) recorded for cage **1**.

1.2  $^1\text{H}$  NMR spectrum of cage **1**.

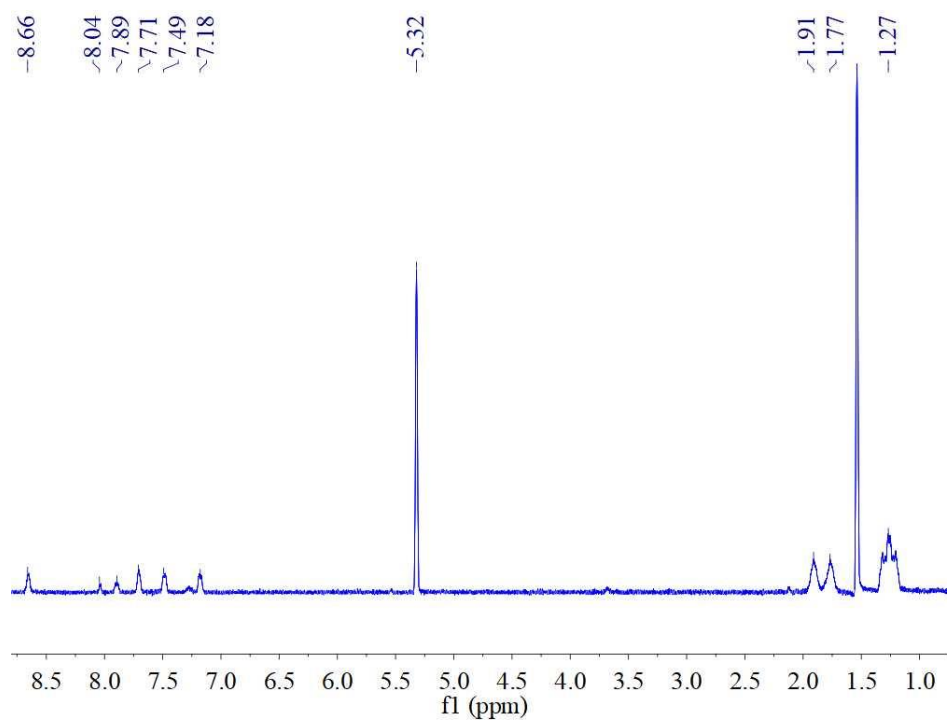

Figure S2.  $^1\text{H}$  NMR spectrum (400 MHz,  $\text{CD}_2\text{Cl}_2$ ) recorded for cage **1**.

### 1.3 ESI -TOF-MS spectrum of cage 1.

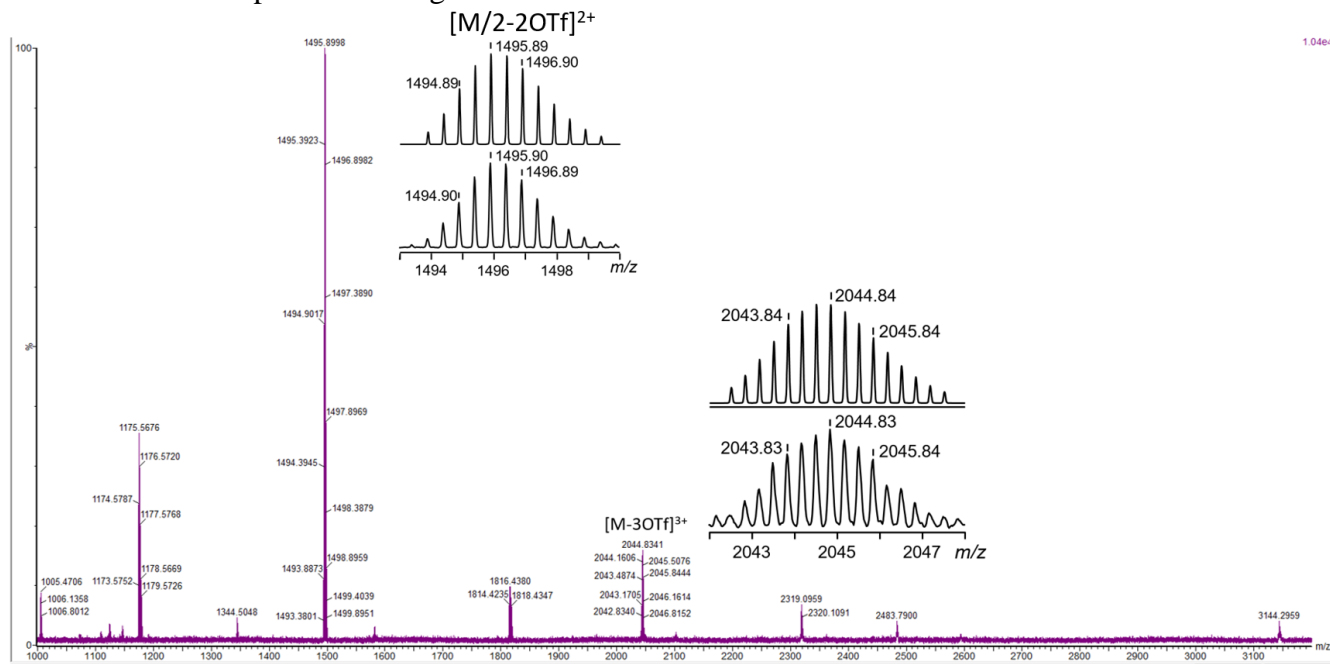

Figure S3. ESI -TOF-MS spectrum of cage 1.

### 1.4 UV-vis spectrum of cage 1 (10 $\mu$ M) in DCM.

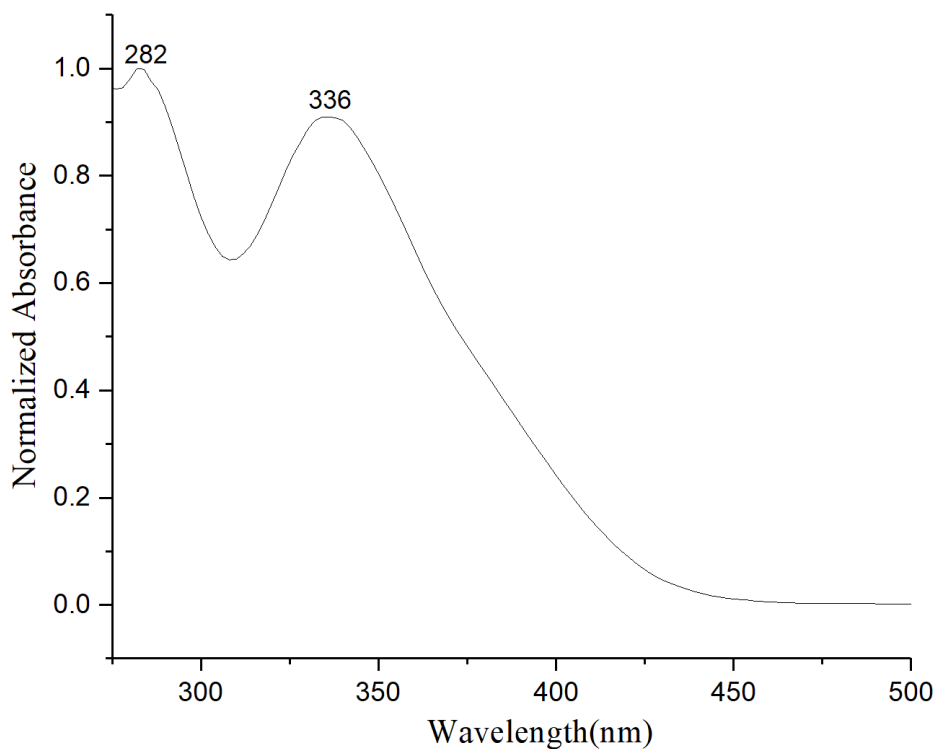

Figure S4. UV-vis spectrum of cage 1 (10  $\mu$ M) in DCM.

### 1.5 UV-vis spectrum of cage 1 (10 $\mu$ M) in EA

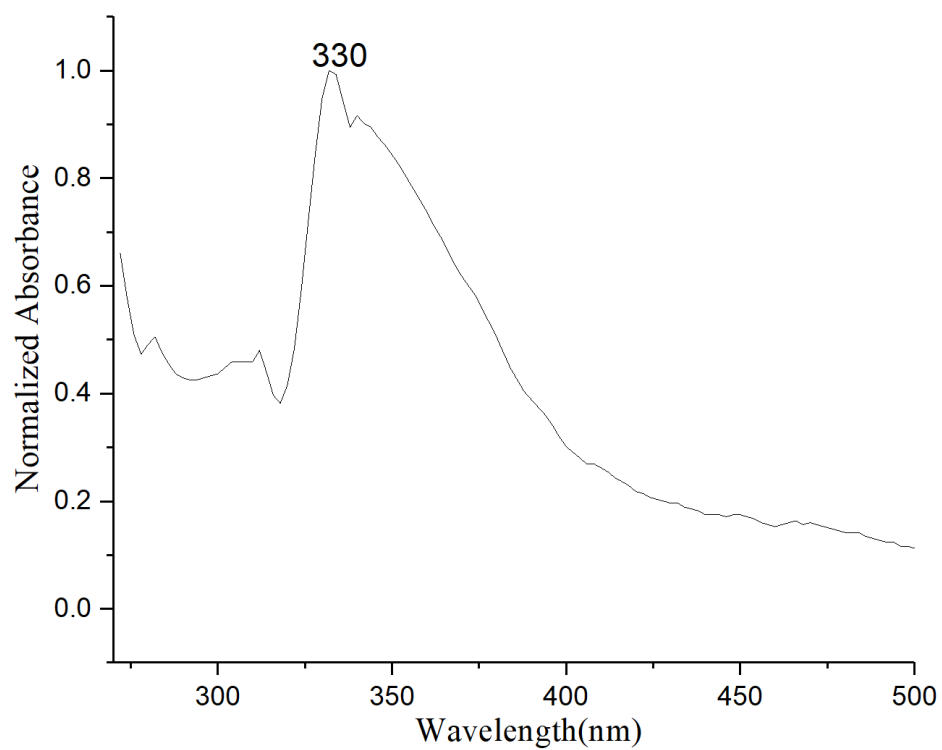

**Figure S5.** UV-vis spectrum of cage 1 (10  $\mu$ M) in EA.

### 1.6 UV-vis spectrum of cage 1 in DCM/EA mixture with 80% EA

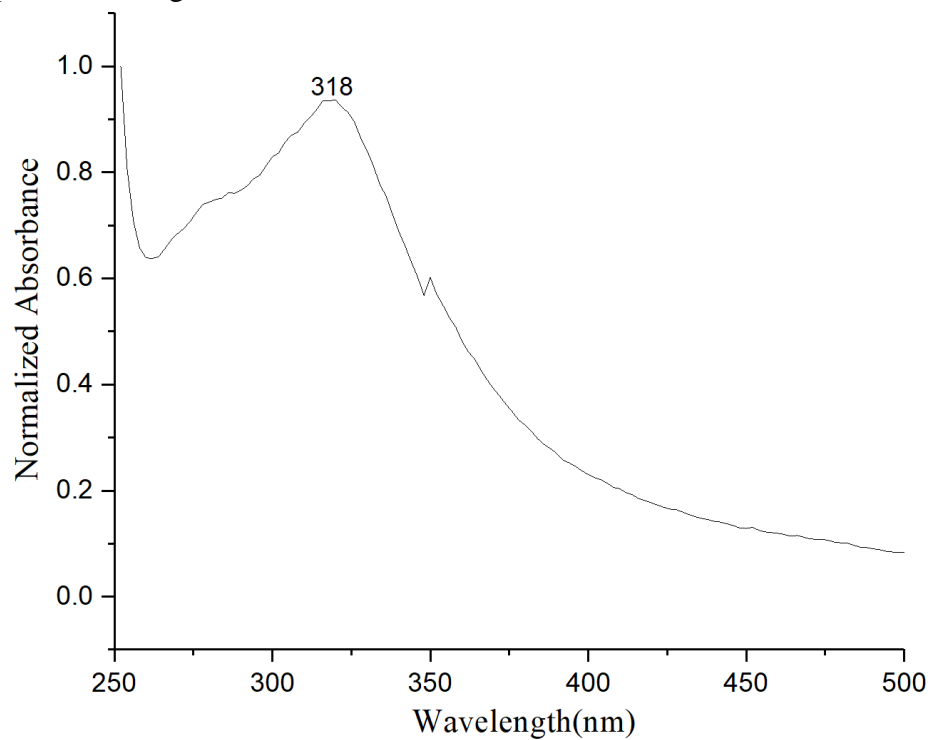

**Figure S6.** UV-vis spectrum of cage 1 (10  $\mu$ M) in DCM/EA mixture with 80% EA.

### 1.7 Fluorescence spectrum of cage 1 in DCM

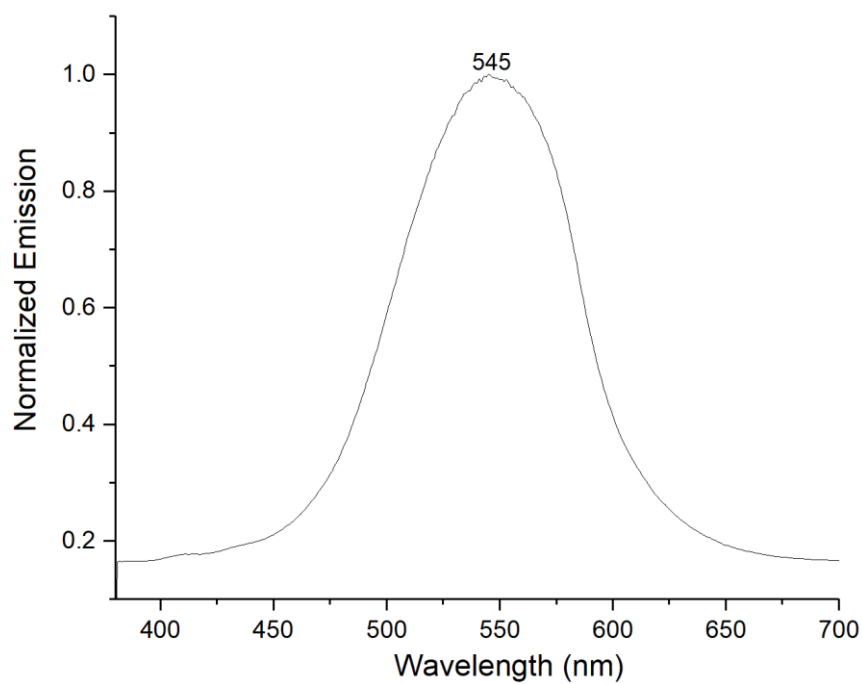

*Figure S7.* Fluorescence spectrum of cage 1 (10  $\mu$ M) in DCM.

### 1.8 Fluorescence spectrum of cage 1 in EA

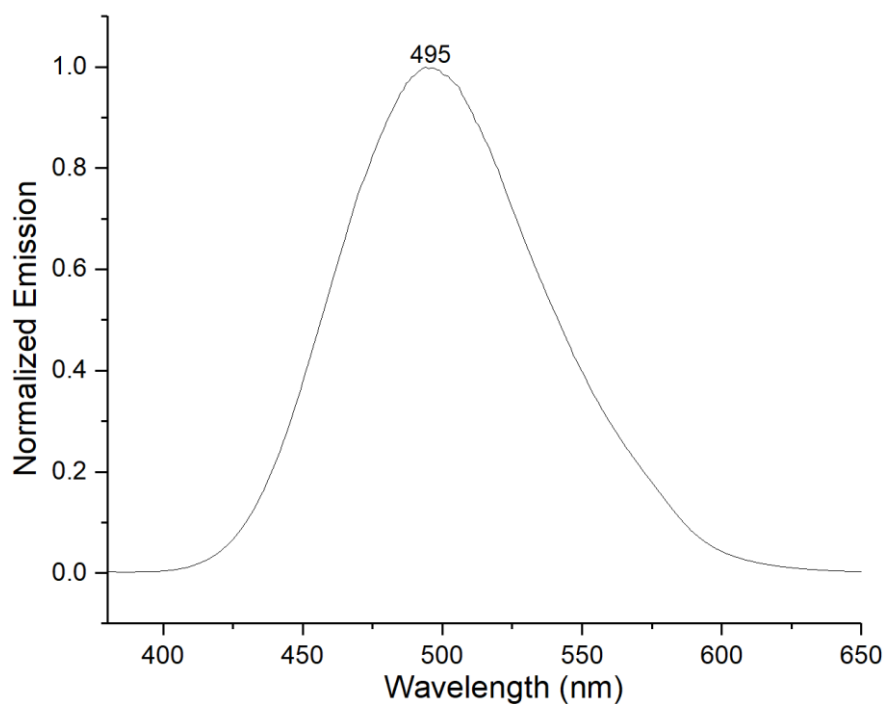

*Figure S8.* Fluorescence spectrum of cage 1 (10  $\mu$ M) in EA.

### 1.9 Fluorescence spectrum of cage 1 (10 $\mu\text{M}$ ) in DCM/EA mixture with 80% EA

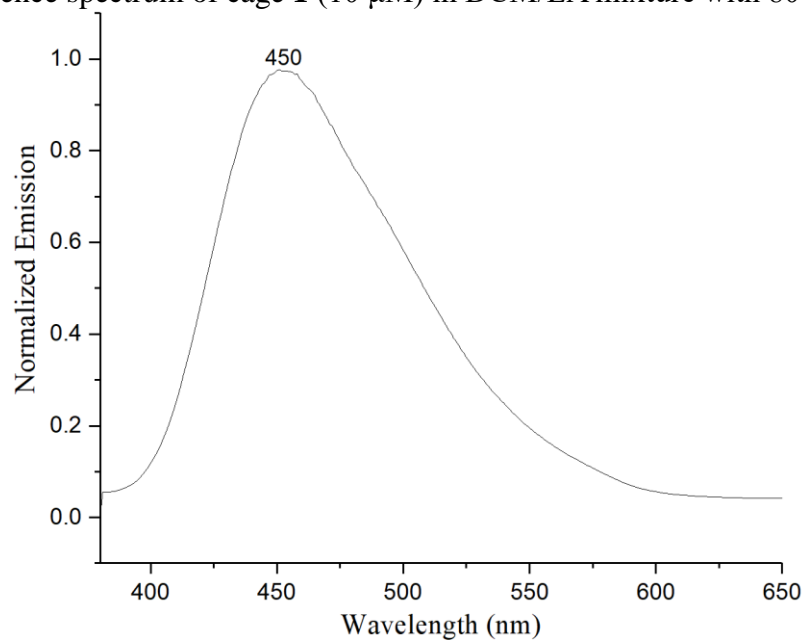

**Figure S9.** Fluorescence spectrum of cage 1 (10  $\mu\text{M}$ ) in DCM/EA mixture with 80% EA.

### 1.10 Corresponding histograms of microflowers formed in 80 % EA

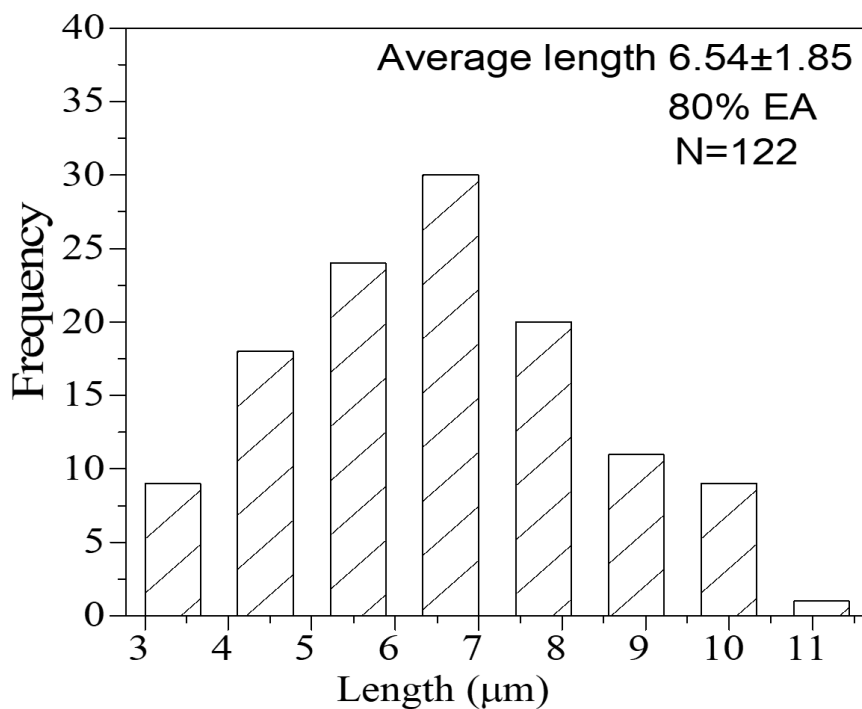

**Figure S10.** Corresponding histograms of the size distribution of needle-based microflowers (in Figure 1d).



### 1.11 Fluorescence microscopy images of microflowers formed in 80 % EA

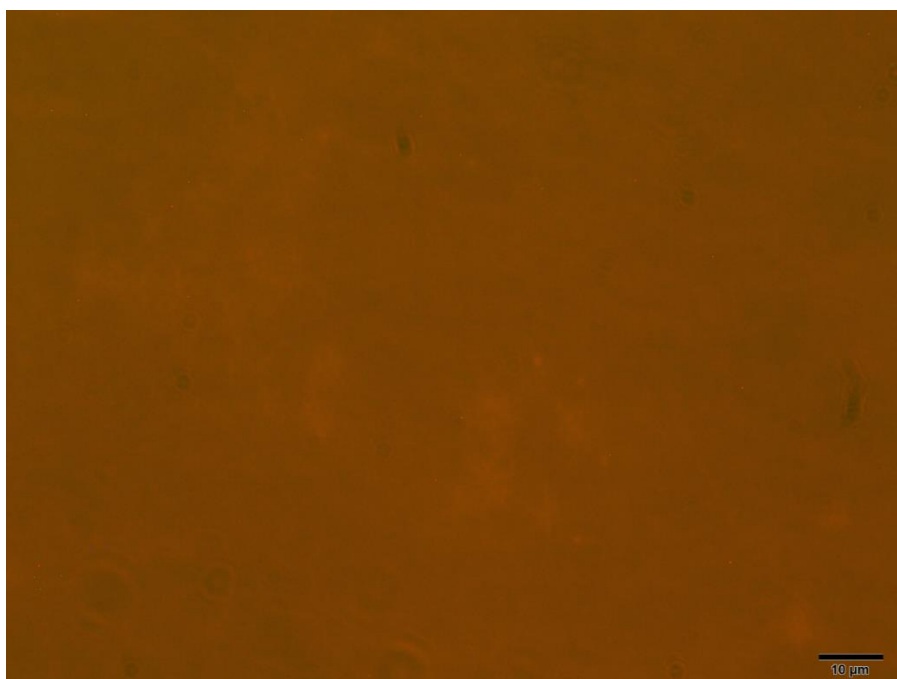

**Figure S11.** Fluorescence microscopy images of these assemblies (in Figure 1e-f) under green-light excitation.

### 1.12 $^{31}\text{P}\{^1\text{H}\}$ NMR spectrum of cage **1**-based microflowers

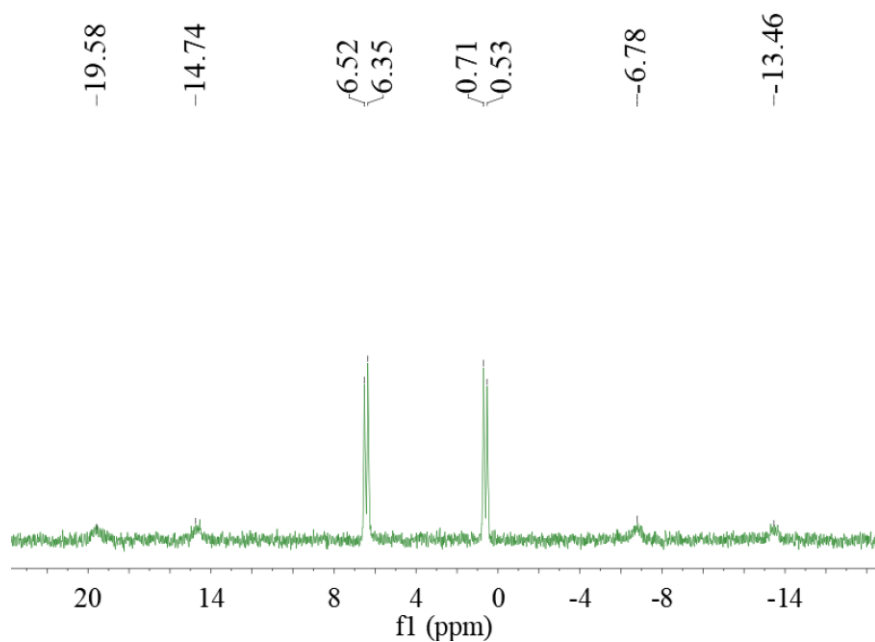

**Figure S12.**  $^{31}\text{P}\{^1\text{H}\}$  NMR spectrum of cage **1**-based microflowers redispersed in DCM.

### 1.13 $^1\text{H}$ NMR spectrum of cage **1**-based microflowers

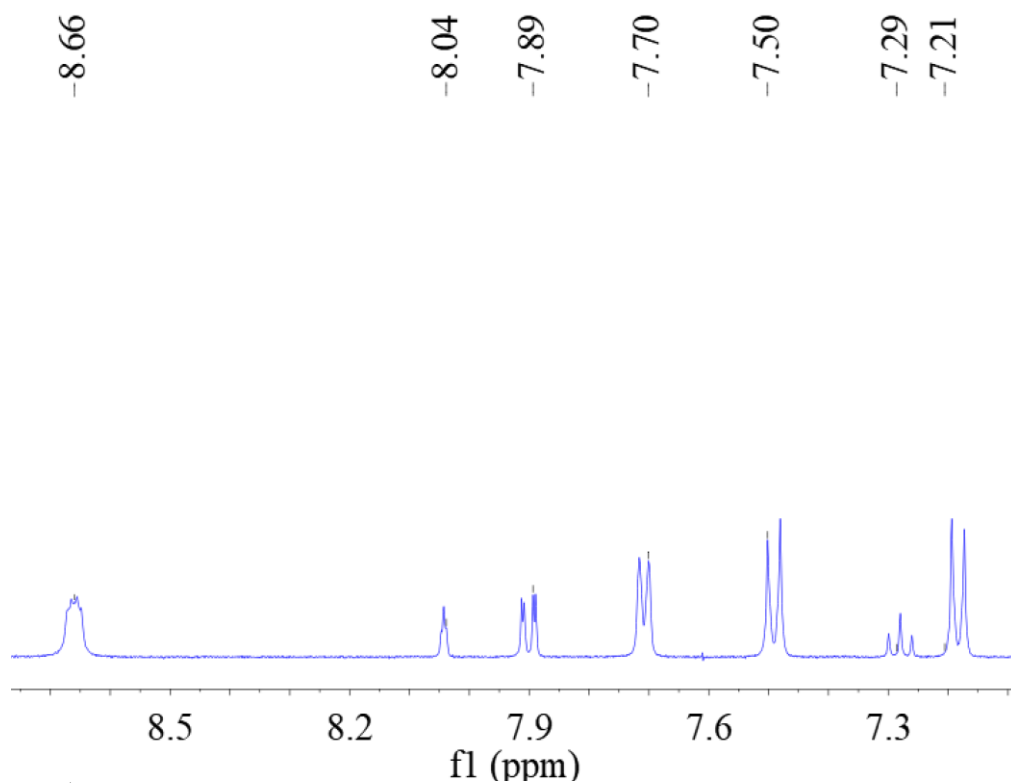

**Figure S13.**  $^1\text{H}$  NMR spectrum of cage **1**-based microflowers redispersed in DCM.

### 1.14 ESI -TOF-MS spectrum of cage **1** formed in 80 % EA

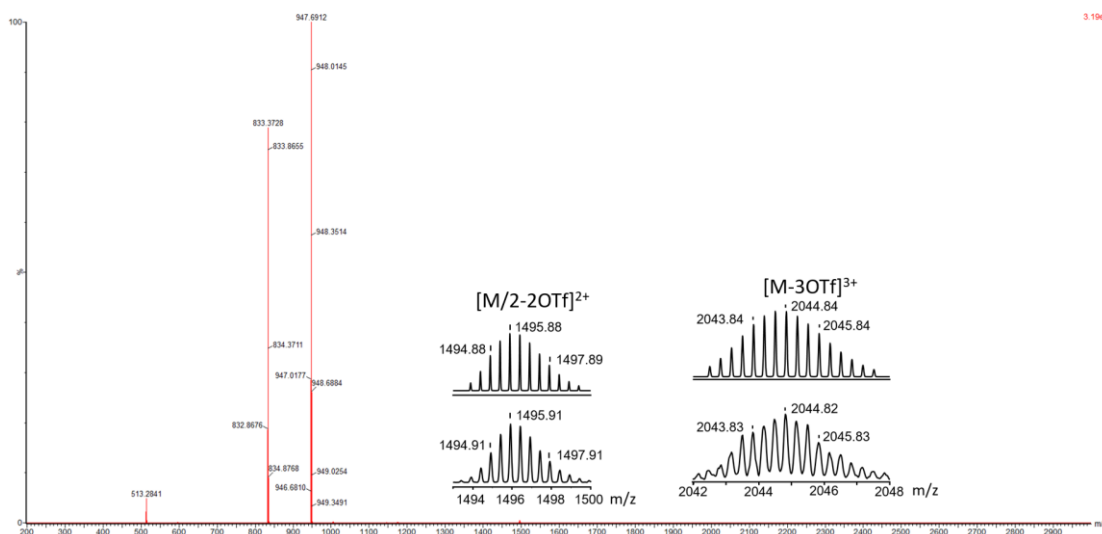

**Figure S14.** ESI -TOF-MS spectrum of cage **1**.

### 1.15 Simulated structure of the cage 1

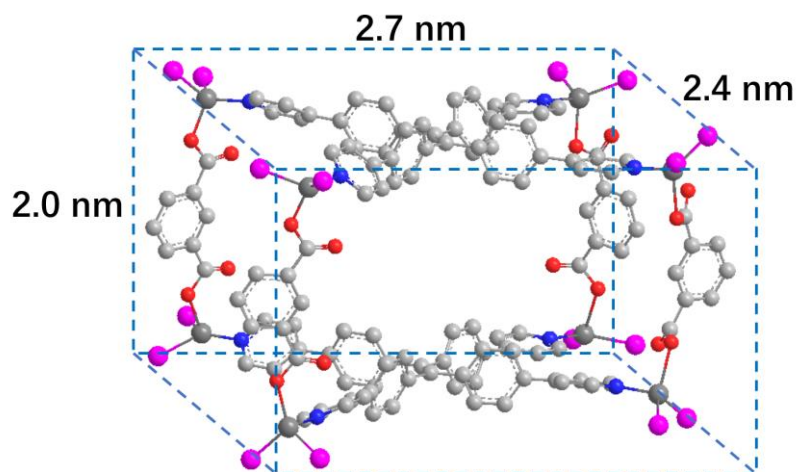

**Figure S15.** Simulated structure of the cage 1.

### 1.16 SEM images of nanostructures formed in 90% EA

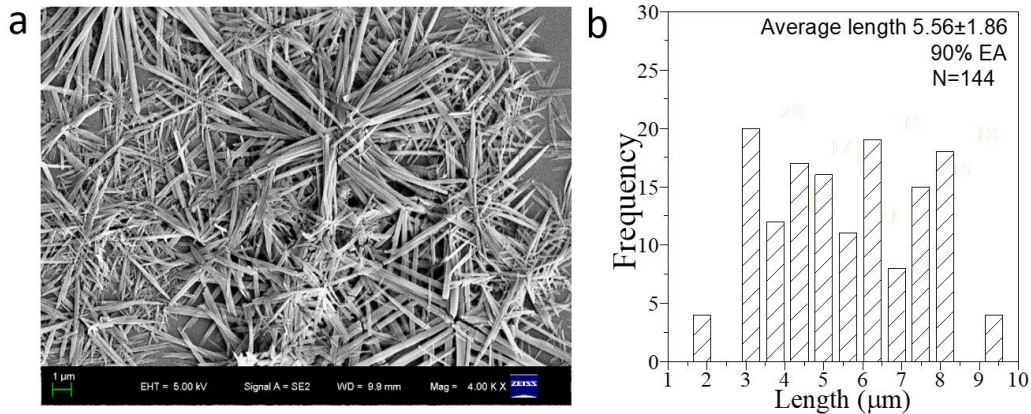

**Figure S16.** SEM images of (a) nanostructures formed from cage 1 (10 μM) in DCM/EA mixture (fresh prepared) with 90%. (b) Histograms of the size distribution of needle-based microflowers formed from cage M (10 μM) in DCM/EA mixture (fresh prepared) with 90% EA.

## 1.17 XRD profile

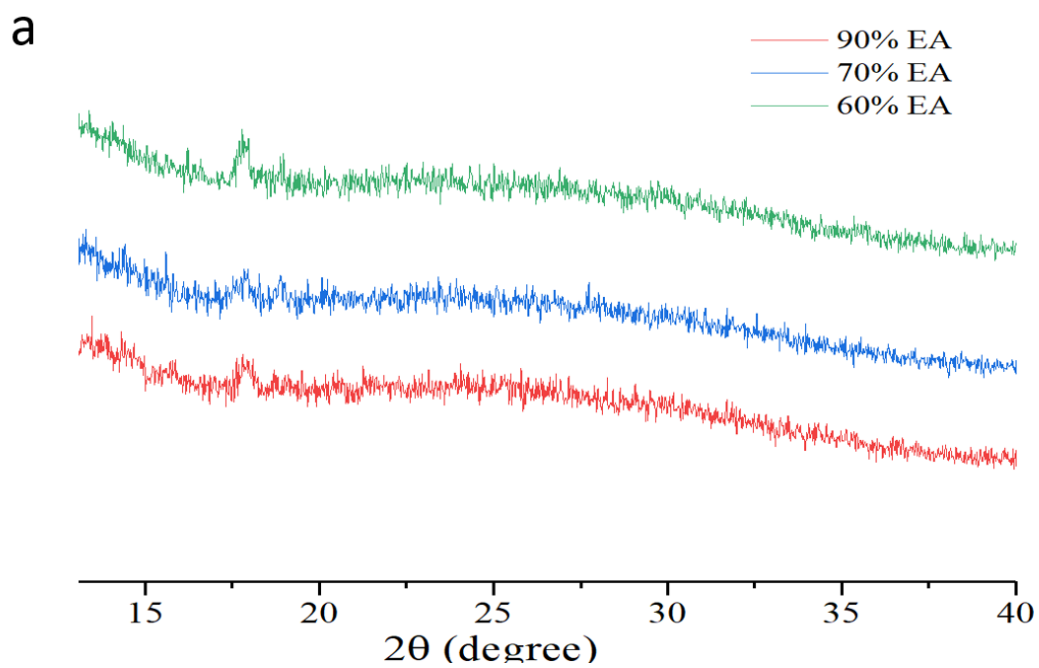

*Figure S17.* XRD profile of microflowers.

### 1.18 Fluorescence spectra of cage 1.

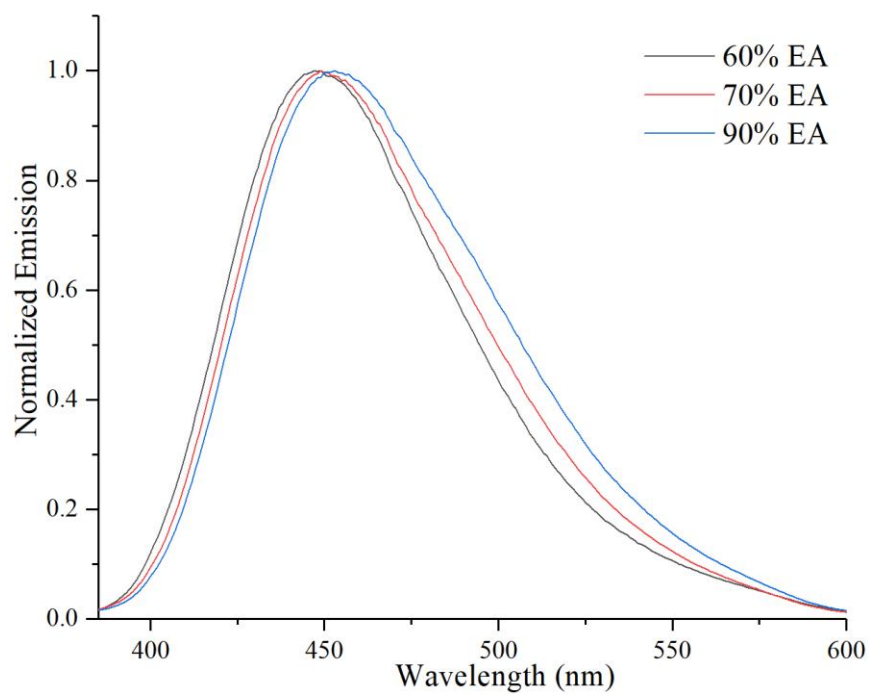

**Figure S18.** Fluorescence spectra of cage 1 (10  $\mu$ M) in DCM/EA mixture.

### 1.19 UV-vis spectra of cage 1.

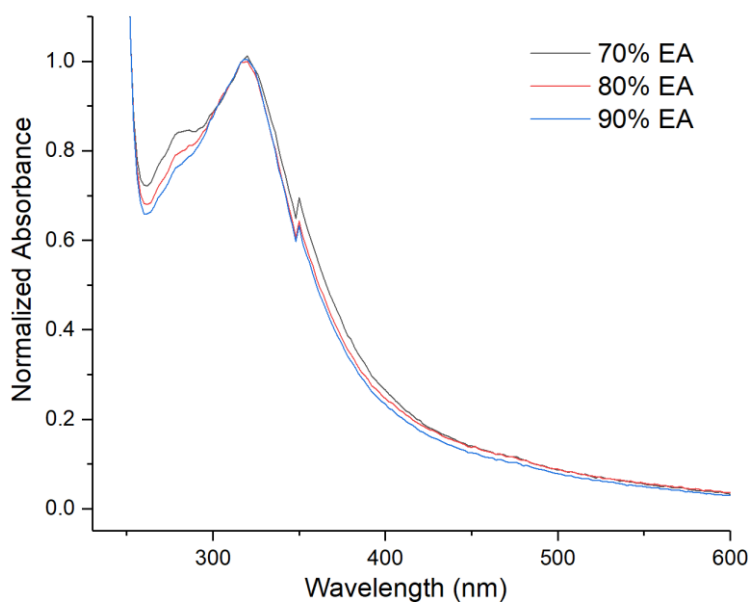

**Figure S19.** UV-vis spectra of cage 1 (10  $\mu$ M) in DCM/EA mixture.

## 1.20 NMR spectra of cage 1 (100 $\mu$ M) in DCM/EA mixtures

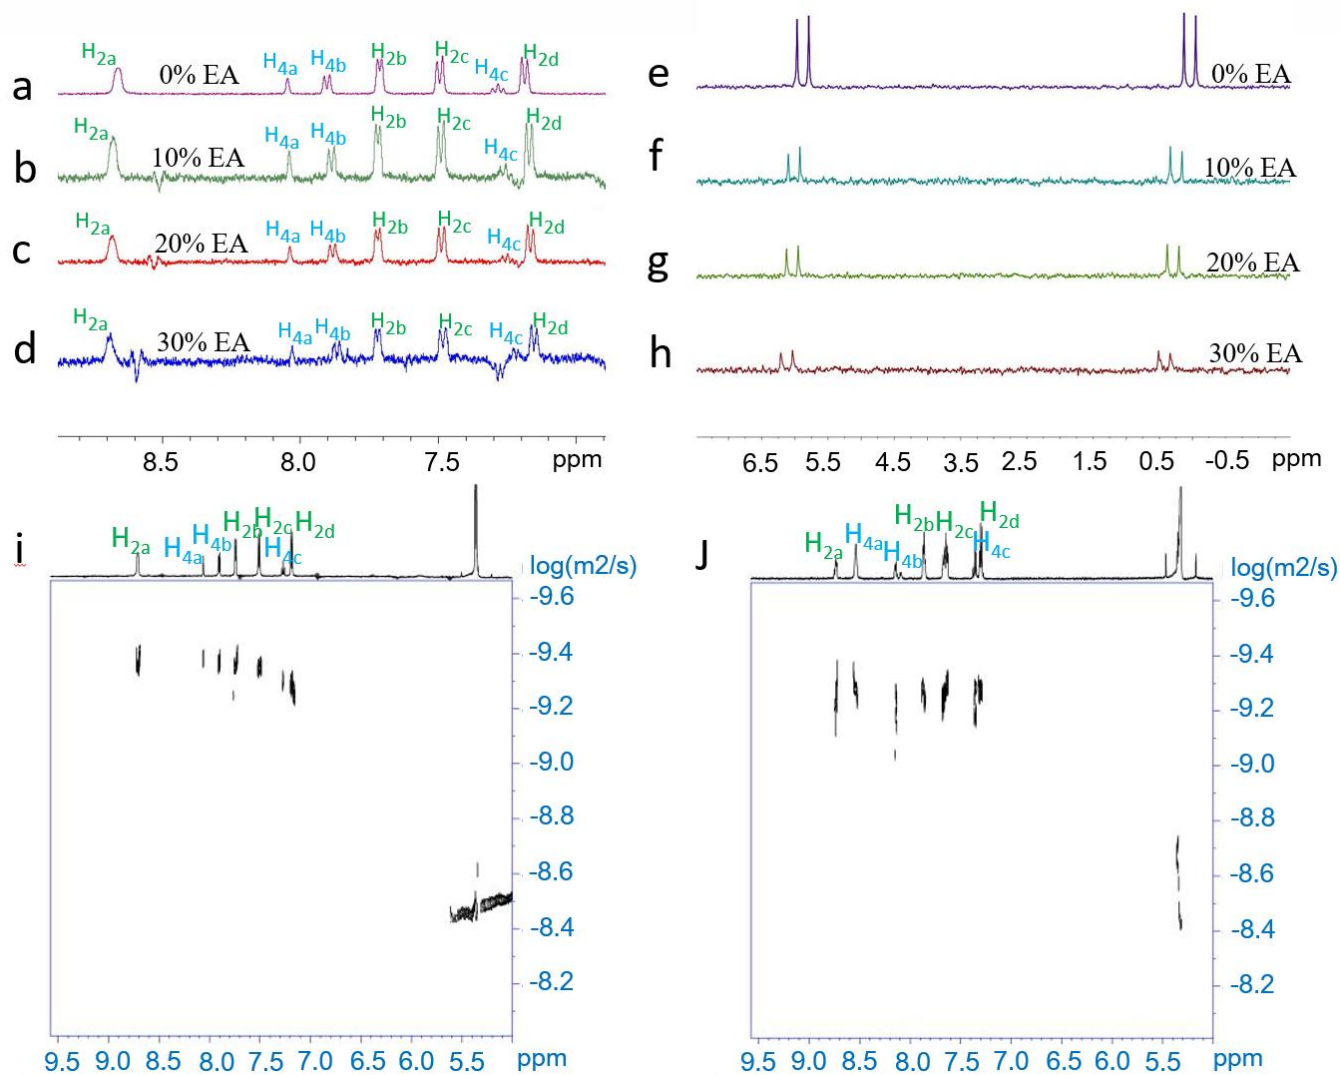

**Figure S20.**  $^1\text{H}$  NMR spectra of cage 1 (100  $\mu\text{M}$ ) in DCM/EA mixtures with (b) 0%, (c) 10%, (d) 20%, and (e) 30% EA.  $^{31}\text{P}\{^1\text{H}\}$  NMR spectra of cage 1 (100  $\mu\text{M}$ ) in DCM/EA mixtures with (f) 0%, (g) 10%, (h) 20%, and (i) 30% EA. 2D DOSY NMR spectra (600 MHz) of Cage 1 in (j) DCM/EA mixture with EA content is 10% (100  $\mu\text{M}$ ); (k) in pure DCM (100  $\mu\text{M}$ ).

### 1.21 Assemblies obtained at different times

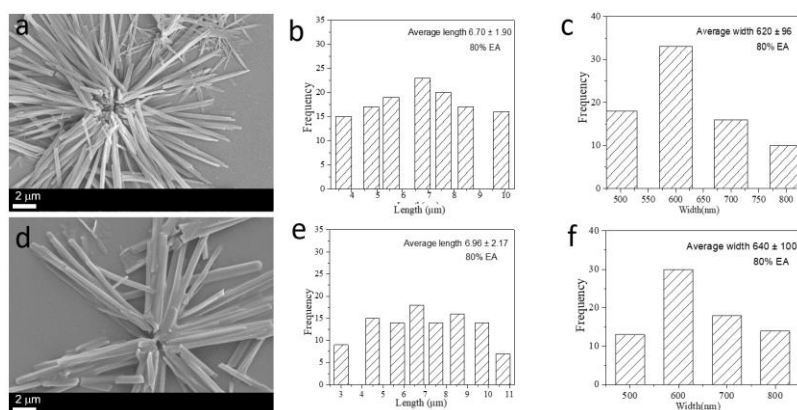

**Figure S21.** SEM images of cage 1 (10 μM) in DCM/EA mixture with 80% EA recorded at different aging time: (a-c) 120 and (d-f) 240 min.

### 1.22 Elemental mapping analysis of microneedles/microflowers

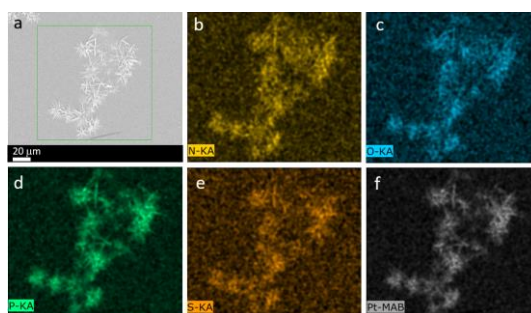

**Figure S22.** SEM and Elemental mapping analysis of microneedles/microflowers.

### 1.23 Microneedles/microflowers obtained at different temperature

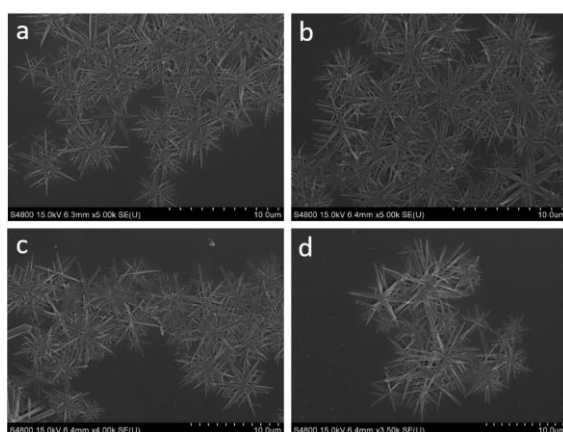

**Figure S23.** SEM images of cage 1 (10 μM) in DCM/EA mixture at different temperature: (a-b) 0 °C and (c-d) 30 °C.



### 1.24 Chemical structure of lysine-modified perylene

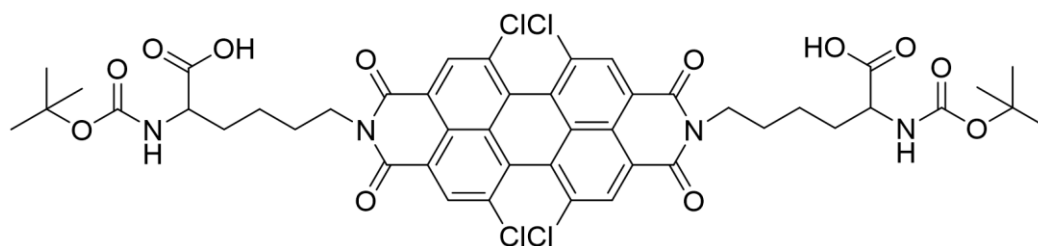

**Figure S24.** Chemical structure of lysine-modified perylene.

### 1.25 Histograms of the size distribution of microflowers formed in 80% EA

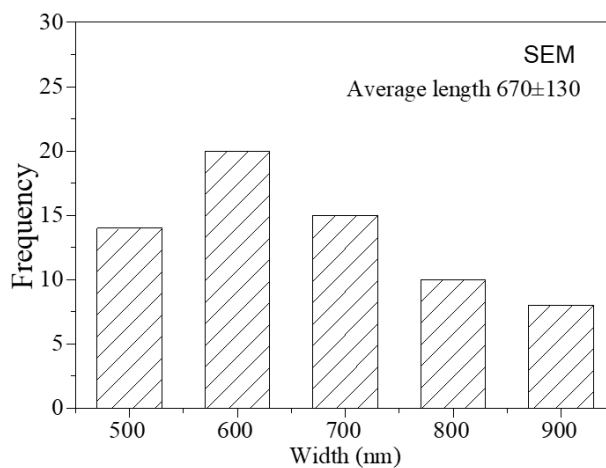

**Figure S25.** Histograms of the size distribution (width) of needle-based microflowers by cage 1 (10  $\mu$ M) in a DCM/EA mixture with 80% EA.

### 1.26 Optical and polarized images of needle-based flowers formed by the coassembly of cage 1 and perylene

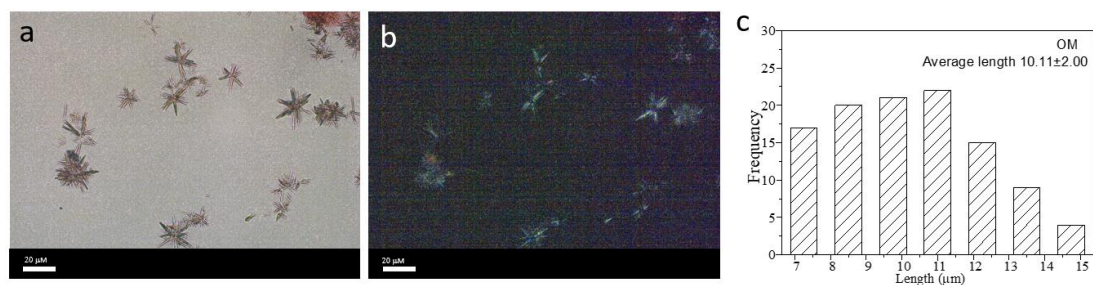

**Figure S26.** Optical (a) and polarized (b) images of needle-based flowers contained lysine-modified perylene. (c) Corresponding histogram.



---

**1.27** SAXS profile of needle-based flowers formed by the coassembly of cage 1 and perylene

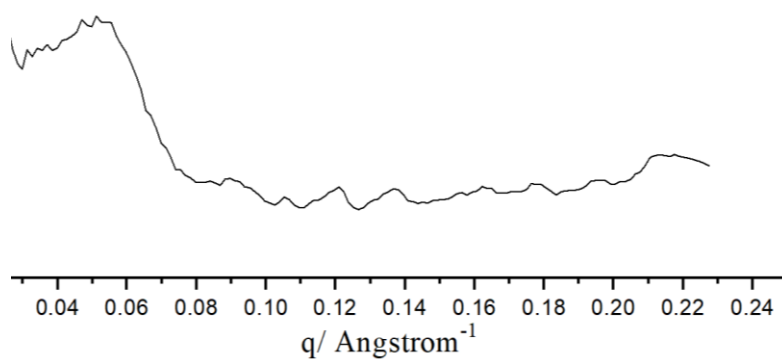

**Figure S27.** Corresponding SAXS profile of cage 1 and lysine-modified perylene in DCM/EA mixture with 80% EA.

**1.28** <sup>31</sup>P{<sup>1</sup>H}NMR spectra microflowers redispersed in DCM.

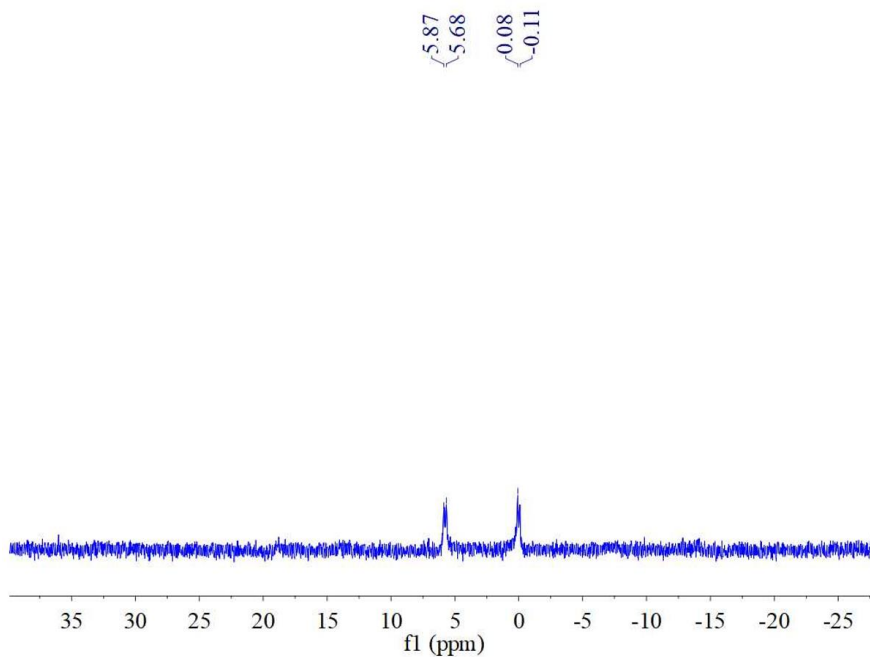

**Figure S28.** <sup>31</sup>P{<sup>1</sup>H}NMR spectra of perylene-contained microflowers redispersed in DCM.

---

### 1.29 $^1\text{H-NMR}$ of cage **1**, perylene, and the mixture of cage **1** and perylene

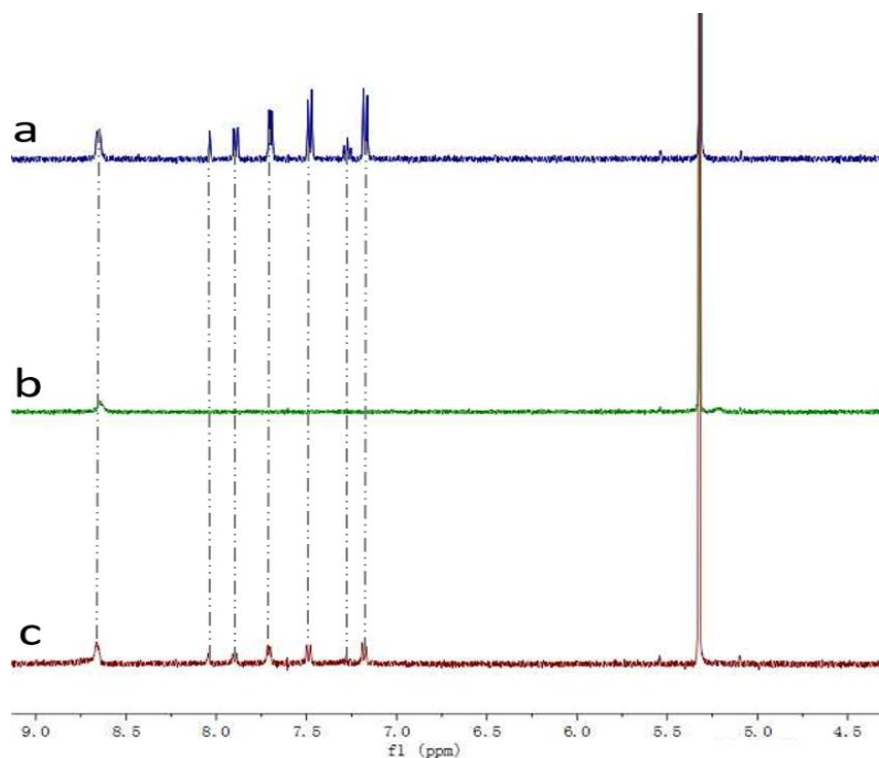

**Figure S29.**  $^1\text{H-NMR}$  of (a) cage **1**, (b) lysine-modified perylene, and (c) cage **1** and lysine-modified perylene (400 Hz,  $\text{CD}_2\text{Cl}_2$ ).

### 1.30 Fluorescence microscopy images of the chlorophyll-a contained assemblies

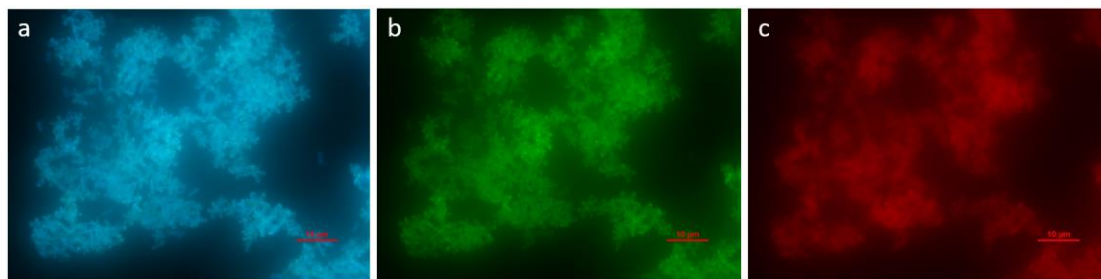

**Figure S30.** Fluorescence microscopy images of the chlorophyll-a contained assemblies under (e) ultraviolet-light excitation, (f) blue-light excitation and (g) green-light excitation.

### 1.31 $^1\text{H-NMR}$ of cage **1**, chlorophyll-a, and the mixture of cage **1** and chlorophyll-a

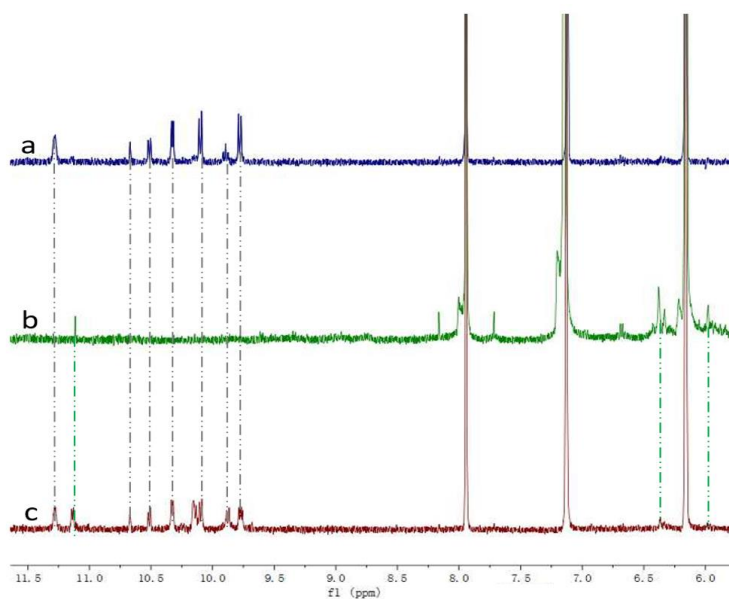

**Figure S31.**  $^1\text{H-NMR}$  of (a) cage **1**, (b) chlorophyll-a, and (c) cage **1** and lysine-modified chlorophyll-a (400 Hz,  $\text{CD}_2\text{Cl}_2/\text{Ethanol-}d^6=2:1$ ).

### 1.32 Fluorescence microscopy images of the Vitamin $\text{B}_{12}$ contained assemblies

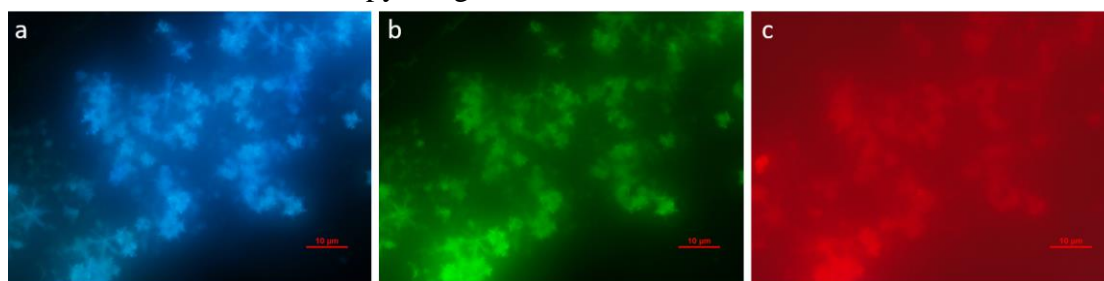

**Figure S32.** Fluorescence microscopy images of the Vitamin  $\text{B}_{12}$  contained assemblies under (e) ultraviolet-light excitation, (f) blue-light excitation and (g) green-light excitation.

1.33  $^1\text{H-NMR}$  of cage **1**, Vitamin B<sub>12</sub>, and the mixture of cage **1** and Vitamin B<sub>12</sub>

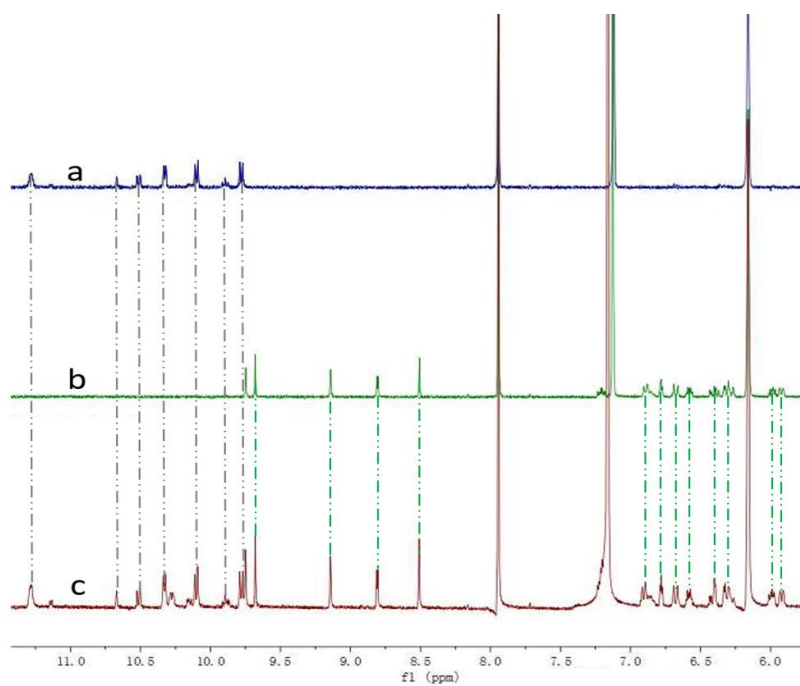

**Figure S33.**  $^1\text{H-NMR}$  of (a) cage **1**, (b) Vitamin B<sub>12</sub>, and (c) cage **1** and lysine-modified Vitamin B<sub>12</sub> (400 Hz,  $\text{CD}_2\text{Cl}_2/\text{Ethanol-d}^6=2:1$ ).
